# Supplementary material for: Decreased long non-coding RNA MTM contributes to gastric cancer cell migration and invasion via modulating MT1F
Source: PubMed Central journal article supplement (PMC5722569; doi:10.18632/oncotarget.22126), 2017-10-26
Supplement: oncotarget-08-97371-s001.pdf [file oncotarget-08-97371-s001.pdf]

## Decreased long non-coding RNA MTM contributes to gastric cancer cell migration and invasion via modulating MT1F

### SUPPLEMENTARY MATERIALS

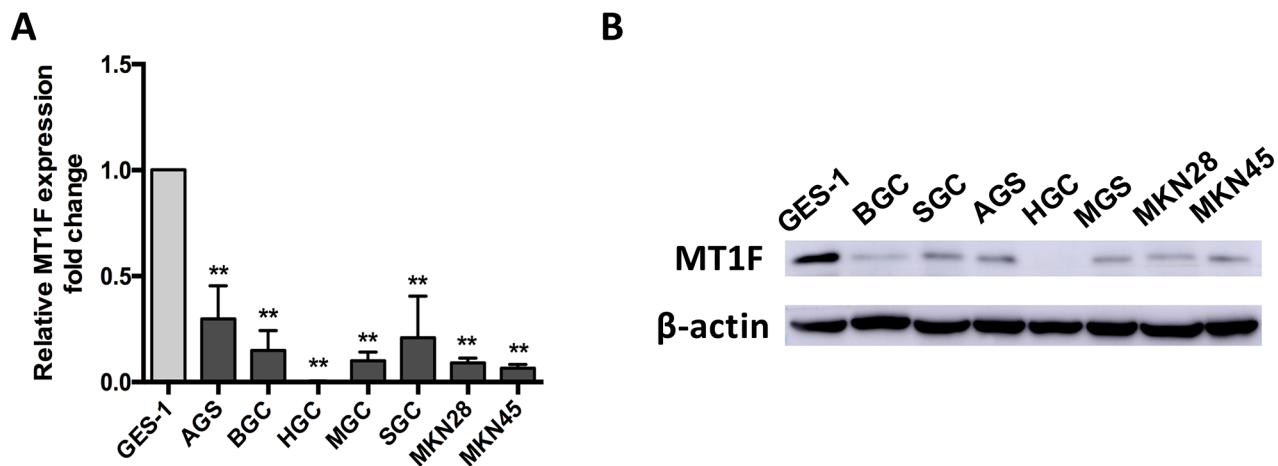

**Supplementary Figure 1: MT1F expression is down regulated in human gastric cancer (GC) cell lines.** (A) Expression of MT1F mRNA in 7 GC cell lines and GES-1. Expression levels are normalized to GES-1. Data were presented as the mean  $\pm$  SD (n=3, \*\*P<0.01). (B) The protein expression level of MT1F in 7 GC cell lines and GES-1.

Supplementary Table 1: The sequences of the primers used in the study

| Primers                                  | Sequence, 5'–3'                                          |
|------------------------------------------|----------------------------------------------------------|
| <b>Primers for qRT-PCR:</b>              |                                                          |
| MTM-1F                                   | CTCCAGCCTCACCTGATCTC                                     |
| MTM-1R                                   | AGCTGCACTTCTCCAATGC                                      |
| MT1A-F                                   | GGGCATCAGAGAAGTGACAG                                     |
| MT1A-R                                   | ATGGGTCAAGGTTGTATGGA                                     |
| MT1B-F                                   | GAAGTCCAGGCTTGTCTTGG                                     |
| MT1B-R                                   | GGTACATTTGCACTCTTTGCAC                                   |
| MT1E-F                                   | CTGCTTGTTCGTCTCACTGG                                     |
| MT1E-R                                   | GCATTTGCACTCTTTGCACT                                     |
| MT1F-F                                   | GACTGATGCCAGGACAACCT                                     |
| MT1F-R                                   | AGGAATGTAGCAAATGGGTCA                                    |
| MT1X-F                                   | GGAACTCCTGCTTCTCCTT                                      |
| MT1X-R                                   | GCATTTGCACTCTTTGCATT                                     |
| MT2A-F                                   | GACTCTAGCCGCCTCTTCAG                                     |
| MT2A-R                                   | GCATTTGCACTCTTTGCATT                                     |
| GAPDH-F                                  | GAAGGTGAAGGTCGGAGT                                       |
| GAPDH-R                                  | GAAGATGGTGATGGGATTC                                      |
| snRNA U6-F                               | CTCGCTTCGGCAGCACA                                        |
| snRNA U6-R                               | ATTTA TTTAT GGGGA TTTGG GTTT                             |
| MMP2-F                                   | ACGACCGCGACAAGAAGTAT                                     |
| MMP2-R                                   | ATTTGTTGCCAGGAAAGTG                                      |
| MMP7-F                                   | GTCTCTGGACGGCAGCTATG                                     |
| MMP7-R                                   | GAGCCTGTTCCCACTGTAGC                                     |
| MMP9-F                                   | TCGAACTTTGACAGCGACAAG                                    |
| MMP9-R                                   | GCACTGAGGAATGATCTAAGC                                    |
| MMP14-F                                  | GGCGGGTGAGGAATAAC                                        |
| MMP14-R                                  | AGCATCAATCTTGTCGGTAG                                     |
| <b>Primers for full-length: product:</b> |                                                          |
| MTM-2F                                   | CGGGATCCCCTGTGGCTTAGGAACTC                               |
| MTM-2R                                   | CGGAATTCAAGCCAACAATGTTTATTATC                            |
| MT1F-F                                   | ACGGGCCCTCTAGACTCGAGCGCCAC<br>CATGGACCCCACTGCTCCTGCGCCGC |
| MT1F-R                                   | TTAAACTTAAGCTTGGTACCTCAGTCGC<br>AGCAGCTGCACTTC           |

-F: forward primer, -R: reverse primer.
